# Supplementary material for: Construction and evolution of active palladium species on phase-regulated reducible TiO2 for methane combustion
Source: Royal Society of Chemistry journal article supplement (doi:10.1039/d0cy01658f), 2020-11-20
Supplement: d0cy01658f1.pdf [file d0cy01658f1.pdf]

## Supporting Information

### Construction and Evolution of Active Palladium Species on Phase-Regulated Reducible TiO<sub>2</sub> for Methane Combustion

Yihong Xiao, Juanjuan Li, Chen Wang, Fulan Zhong, Yong Zheng\*, and Lilong Jiang

National Engineering Research Center of Chemical Fertilizer Catalyst, Fuzhou University,

Fuzhou, Fujian 350002, P. R. China

\*Corresponding authors:

Dr. Yong Zheng

Tel: +86 0591 83731234-8201, Fax: +86 0591 83709796,

E-mail: zhengyong@fzu.edu.cn

## Catalyst characterization

Temperature programmed oxidation by O<sub>2</sub> (O<sub>2</sub>-TPO): samples were heated up to 350 °C under He flow and held for 30 min, then cooled to 100 °C. Subsequently, the catalyst was exposed to a mixture of 2 vol.% O<sub>2</sub> in He (flow rate: 30 mL min<sup>-1</sup>), and the temperature was then increased to 800 °C (ramp rate: 10 °C min<sup>-1</sup>) and cooled down. The oxygen concentration was monitored by the TCD.

Temperature programmed desorption of O<sub>2</sub> (O<sub>2</sub>-TPD): 100 mg catalyst was pretreated under He flow at 350 °C for 30 min. Then 2 vol. % O<sub>2</sub>/He was switched on and held for another 30 min. Afterward, the catalyst was cooled to 50 °C under 2 vol. % O<sub>2</sub>/He then heated to 900 °C under He flow, the mass signal of O<sub>2</sub> (m/z = 32) was recorded.

Temperature programmed reduction by H<sub>2</sub> (H<sub>2</sub>-TPR): Prior to reduction tests, each sample (100 mg) was pretreated in an argon flow (flow rate: 30 mL min<sup>-1</sup>) holding at 300 °C for 30 min and was then cooled to 50 °C. The data were collected from 50 to 800 °C under 10 vol. % H<sub>2</sub>/Ar (flow rate: 30 mL min<sup>-1</sup>) at a heating rate of 10 °C min<sup>-1</sup>. The results were obtained by the TCD.

Temperature programmed reduction of CH<sub>4</sub> (CH<sub>4</sub>-TPR): the sample was pretreated in a He flow at 300 °C for 30 min, then cooled to 30 °C. Afterward, the sample was heated from 30 °C to 900 °C with a heating rate of 10 °C min<sup>-1</sup> under 10 vol. % CH<sub>4</sub>/Ar gas flow, and the characteristic signals of CH<sub>4</sub> (m/z = 16), CH<sub>3</sub> (m/z = 15), CO<sub>2</sub> (m/z = 44), H<sub>2</sub>O (m/z = 18), CO (m/z = 28), H<sub>2</sub> (m/z = 2) were continuously monitored by mass spectrometer as a function of time and temperature.

**Table S1.** Performance comparison of some Pd/TiO<sub>2</sub> catalysts.

| sample              | Pd loading amount (wt %) | Reaction condition                                                                                                                       | T <sub>50</sub> (°C) | T <sub>99</sub> (°C) | Ref                         |
|---------------------|--------------------------|------------------------------------------------------------------------------------------------------------------------------------------|----------------------|----------------------|-----------------------------|
| PT-1000             | 0.5                      | 1 vol. % CH <sub>4</sub> , 10 vol. % O <sub>2</sub> and N <sub>2</sub> equilibrium gas<br>GHSV=30 000 mL g <sup>-1</sup> h <sup>-1</sup> | 334                  | 370                  | This work                   |
| Pd/TiO <sub>2</sub> | 5                        | 2 vol. % CH <sub>4</sub> , 8 vol. % O <sub>2</sub> and N <sub>2</sub> equilibrium gas<br>GHSV=150000 mL g <sup>-1</sup> h <sup>-1</sup>  | 350                  | >500                 | Niu et al <sup>1</sup>      |
| Pd@TiO <sub>2</sub> | 1                        | 5 vol. % CH <sub>4</sub> , 1 vol. % O <sub>2</sub> and N <sub>2</sub> equilibrium gas<br>GHSV=170000 mL g <sup>-1</sup> h <sup>-1</sup>  | 350                  | 600                  | Ali et al <sup>2</sup>      |
| Pd/TiO <sub>2</sub> | 0.4                      | 300 ppmv CH <sub>4</sub> in air,<br>GHSV=21000 mL g <sup>-1</sup> h <sup>-1</sup>                                                        | 375                  | 600                  | Janbey et al <sup>3</sup>   |
| Pd/TiO <sub>2</sub> | 1                        | 0.3 vol. % CH <sub>4</sub> , 2.4 vol. % O <sub>2</sub> and He equilibrium gas,<br>GHSV=60000 mL g <sup>-1</sup> h <sup>-1</sup>          | 330                  | 500                  | Venezia et al <sup>4</sup>  |
| Pd/TiO <sub>2</sub> | 1.1                      | 1/120 (v/v) of CH <sub>4</sub> /air 120 mL min <sup>-1</sup>                                                                             | 430                  | 540                  | Wang et al <sup>5</sup>     |
| Pd/TiO <sub>2</sub> | 1                        | 1 vol. % CH <sub>4</sub> , 99 vol. % air, GHSV=48000 mL g <sup>-1</sup> h <sup>-1</sup>                                                  | 800                  | >885                 | Sekizawa et al <sup>6</sup> |
| Pd/TiO <sub>2</sub> | 2                        | 1 vol. % CH <sub>4</sub> , 10 vol. % O <sub>2</sub> and He equilibrium gas,<br>GHSV=60000 mL g <sup>-1</sup> h <sup>-1</sup>             | 381                  | >500                 | Carrazán et al <sup>7</sup> |
| Pd/TiO <sub>2</sub> | 2                        | 1 vol. % CH <sub>4</sub> , 99 vol. % air, GHSV=33000 mL g <sup>-1</sup> h <sup>-1</sup>                                                  | -                    | -                    | Lin et al <sup>8</sup>      |

**Table S2.** Cell parameters and crystal size of T-x and PT-x catalysts.

| Sample       | Cell parameters (Å) <sup>a</sup> | Crystallite size (nm) <sup>b</sup> |
|--------------|----------------------------------|------------------------------------|
|              | a=b                              |                                    |
| PT-500       | 4.6019                           | 32.1                               |
| T-500        | 4.5998                           | -                                  |
| PT-600       | 4.5967                           | 65.4                               |
| T-600        | 4.5948                           | -                                  |
| PT-800       | 4.5932                           | 75.5                               |
| T-800        | 4.5918                           | -                                  |
| PT-1000      | 4.5944                           | 78.3                               |
| T-1000       | 4.5932                           | -                                  |
| PT-1200      | 4.5937                           | 84.1                               |
| T-1200       | 4.5914                           | -                                  |
| PT-1000-used | 4.5994                           | 82.6                               |

<sup>a</sup> Obtained from XRD (Fig. 2).

<sup>b</sup> Crystalline size of samples was calculated by the Scherrer equation from the (111) peak of rutile.

| sample  | Pd <sup>4+</sup> |      | Pd <sup>2+</sup> |      | Pd <sup>0</sup> |     | Average<br>n(Pd)/n(Ti)<br>ratio ( $\times 10^2$ ) |
|---------|------------------|------|------------------|------|-----------------|-----|---------------------------------------------------|
|         | BE (eV)          | %    | BE (eV)          | %    | BE (eV)         | %   |                                                   |
| PT-500  | 337.5            | 25.9 | 336.3            | 67.8 | 335.0           | 6.4 | 0.6                                               |
| PT-600  | 337.5            | 19.2 | 336.4            | 75.1 | 335.0           | 5.6 | 1.4                                               |
| PT-800  | 337.5            | 16.1 | 336.5            | 79.3 | 335.1           | 4.5 | 7.3                                               |
| PT-1000 | 337.5            | 15.1 | 336.5            | 81.1 | 335.1           | 3.8 | 11.4                                              |
| PT-1200 | 337.5            | 28.1 | 336.5            | 65.5 | 335.0           | 6.5 | 9.8                                               |

**Table S3.** XPS analyses of Pd 3d<sub>5/2</sub> for PT-x catalysts.

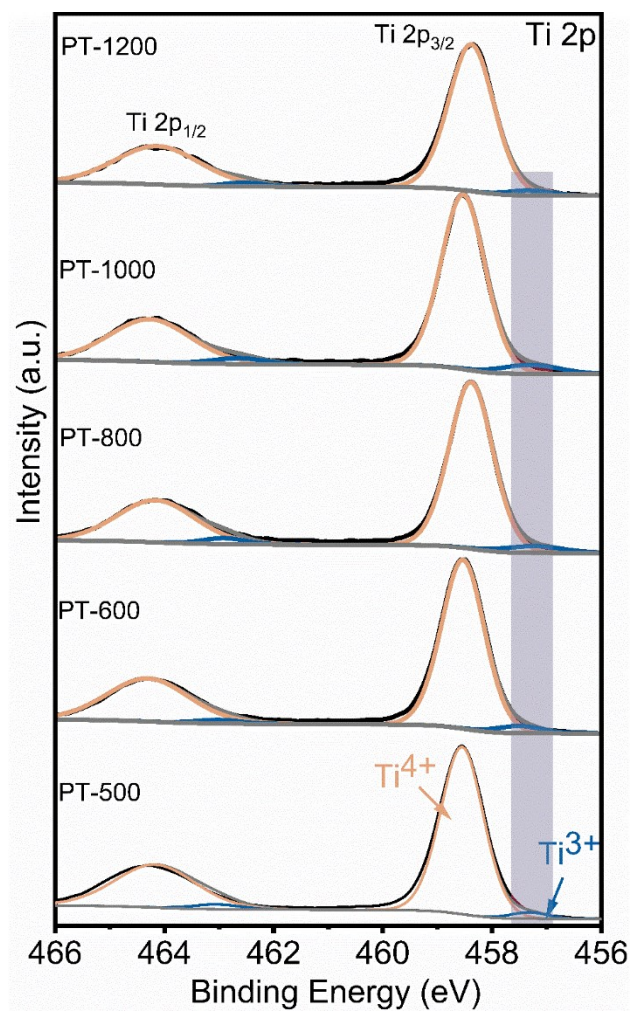

**Fig. S1** Ti 2p spectra of PT-x catalysts.

**Table S4.** XPS analyses of Ti 2p for PT-x catalysts.

| sample  | Ti <sup>4+</sup> | Ti <sup>3+</sup> | Ti <sup>3+</sup> /(Ti <sup>3+</sup> +Ti <sup>4+</sup> ) ratio ( $\times 10^2$ ) |
|---------|------------------|------------------|---------------------------------------------------------------------------------|
|         | BE (eV)          | BE (eV)          |                                                                                 |
| PT-500  | 458.5            | 457.3            | 3.0                                                                             |
| PT-600  | 458.5            | 457.5            | 4.2                                                                             |
| PT-800  | 458.3            | 457.2            | 5.1                                                                             |
| PT-1000 | 458.5            | 457.2            | 6.4                                                                             |
| PT-1200 | 458.3            | 457.2            | 3.5                                                                             |

**Table S5.** XPS analyses of O 1s for PT-x catalysts.

| sample  | O <sub>ads</sub> |      | O <sub>latt</sub> |      | O <sub>ads</sub> /O <sub>latt</sub> ( $\times 10^2$ ) |
|---------|------------------|------|-------------------|------|-------------------------------------------------------|
|         | BE (eV)          | %    | BE (eV)           | %    |                                                       |
| PT-500  | 531.9            | 23.2 | 529.9             | 97.7 | 2.4                                                   |
| PT-600  | 531.9            | 16.0 | 529.8             | 84.0 | 19.0                                                  |
| PT-800  | 531.9            | 21.8 | 529.6             | 78.2 | 27.8                                                  |
| PT-1000 | 531.9            | 32.2 | 529.8             | 67.8 | 47.5                                                  |
| PT-1200 | 531.9            | 18.9 | 529.8             | 81.1 | 23.3                                                  |

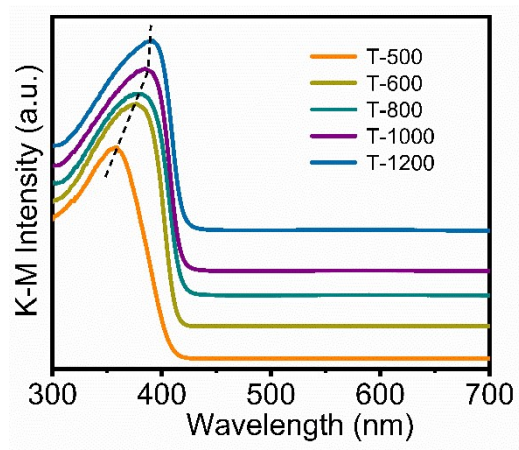

**Fig. S2** UV-Vis DRS spectra of T-x supports.

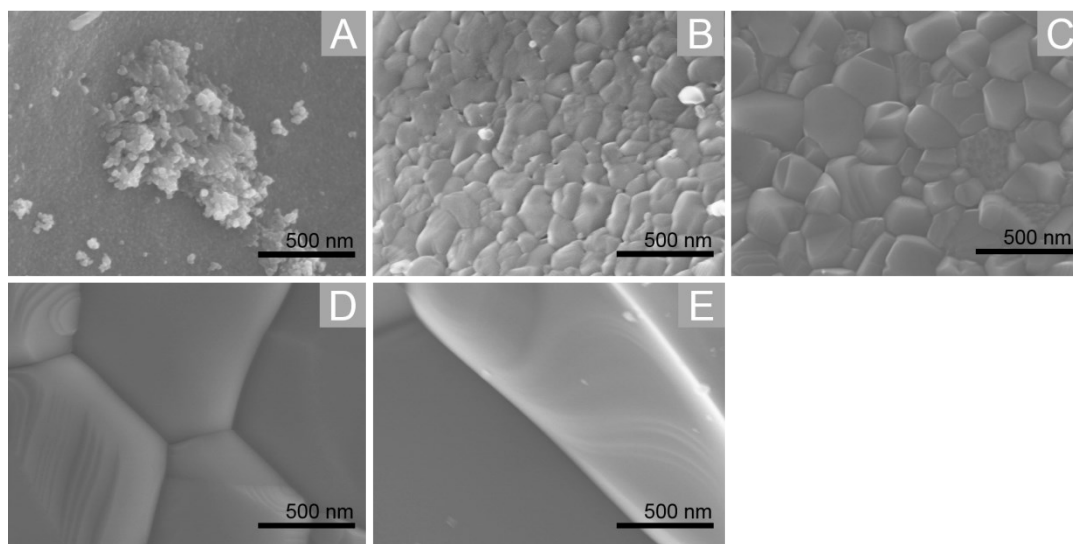

**Fig. S3** SEM images of T-500 (A), T-600 (B), T-800 (C), T-1000 (D) and T-1200 (E) at different magnifications.



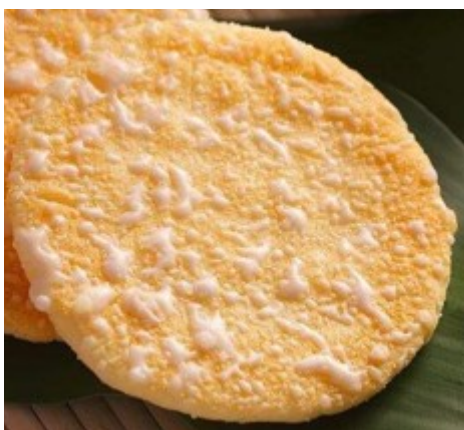

**Fig. S4** Image of “Snow Cookie”, a Chinese snack.

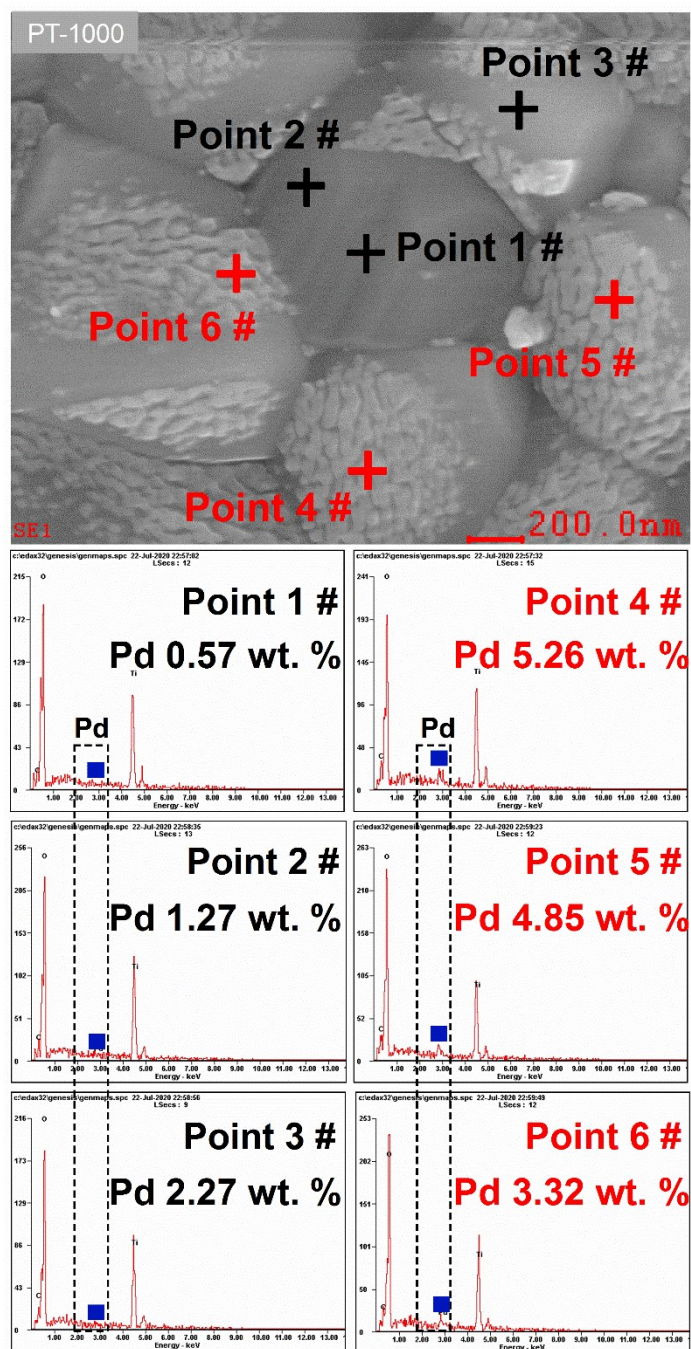

**Fig. S5** EDS analysis performed on the individual particles in PT-1000 catalysts.

**Table S6.** Atomic percent of different elements and average n(Pd)/n(Ti) ratio over PT-x catalysts determined by XPS.

| Catalysts    | Atomic percent (%) |      |       | Average n(Pd)/n(Ti)<br>ratio ( $\times 10^2$ ) |
|--------------|--------------------|------|-------|------------------------------------------------|
|              | Pd                 | O    | Ti    |                                                |
| PT-500       | Area 1#            | 0.23 | 31.52 | 0.6                                            |
|              | Area 2#            | 0.15 | 30.7  |                                                |
| PT-600       | Area 1#            | 0.49 | 68.97 | 1.4                                            |
|              | Area 2#            | 0.42 | 69.04 |                                                |
| PT-800       | Area 1#            | 2.05 | 69.49 | 7.3                                            |
|              | Area 2#            | 2.13 | 69.03 |                                                |
| PT-1000      | Area 1#            | 2.95 | 70.23 | 11.4                                           |
|              | Area 2#            | 3.03 | 71.3  |                                                |
| PT-1200      | Area 1#            | 2.66 | 72.5  | 9.8                                            |
|              | Area 2#            | 2.58 | 69    |                                                |
| PT-1000-used | Area 1#            | 2.49 | 71.66 | 10.1                                           |
|              | Area 2#            | 2.64 | 71.95 |                                                |

<sup>a</sup> the average Pd/Ti ratio was determined based on the calculations of area 1# and area 2# (Spot: mono 500  $\mu\text{m}$ ).

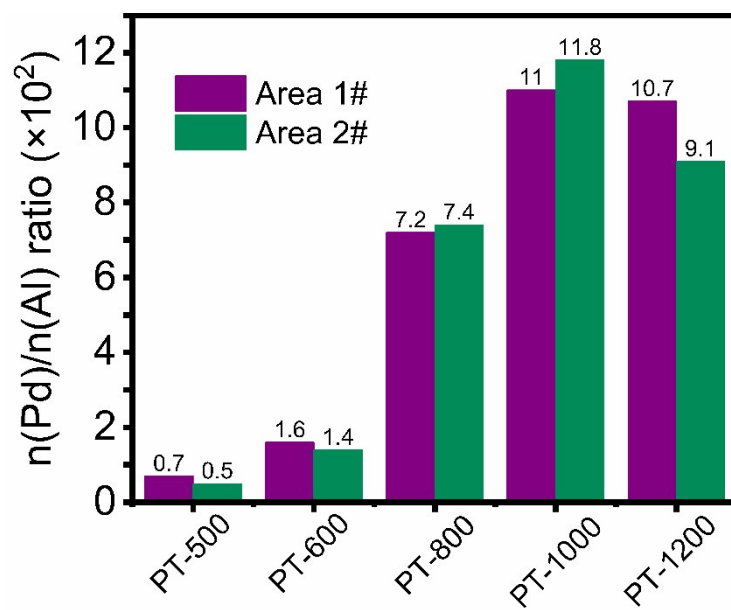

**Fig. S6** n(Pd)/n(Ti) ratios determined through XPS over PT-x catalysts.

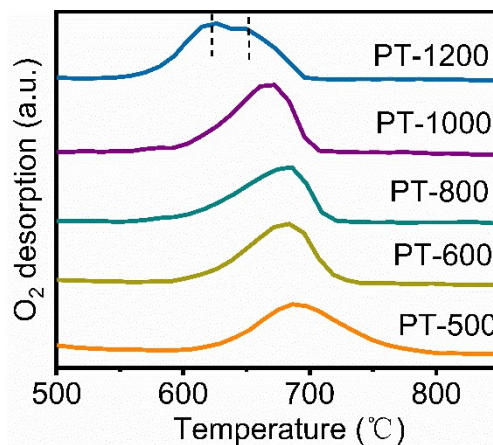

**Fig. S7** O<sub>2</sub>-TPD profiles of the PT-x catalysts.

**Table S7.** O<sub>2</sub>-TPO profiles of PT-x catalysts.

| sample   | Decomposition peak | Decomposition                 | Reoxidation peak        | (PdO+PdO <sub>2</sub> )/     |
|----------|--------------------|-------------------------------|-------------------------|------------------------------|
|          | area of PdO        | peak area of PdO <sub>2</sub> | area of Pd <sup>0</sup> | Pd <sup>0</sup> <sup>a</sup> |
| PT -500  | 10.20              | -                             | 2.70                    | 3.78                         |
| PT -600  | 10.90              | -                             | 3.30                    | 3.30                         |
| PT -800  | 16.10              | -                             | 14.60                   | 1.10                         |
| PT -1000 | 16.76              | -                             | 16.27                   | 1.03                         |
| PT -1200 | 0.30               | 12.3                          | 10.10                   | 1.25                         |

<sup>a</sup> The re-oxidation coefficient (PdO+PdO<sub>2</sub>)/Pd<sup>0</sup> of catalysts is defined as the area of the decomposition peaks divided by that of the re-oxidation peak.

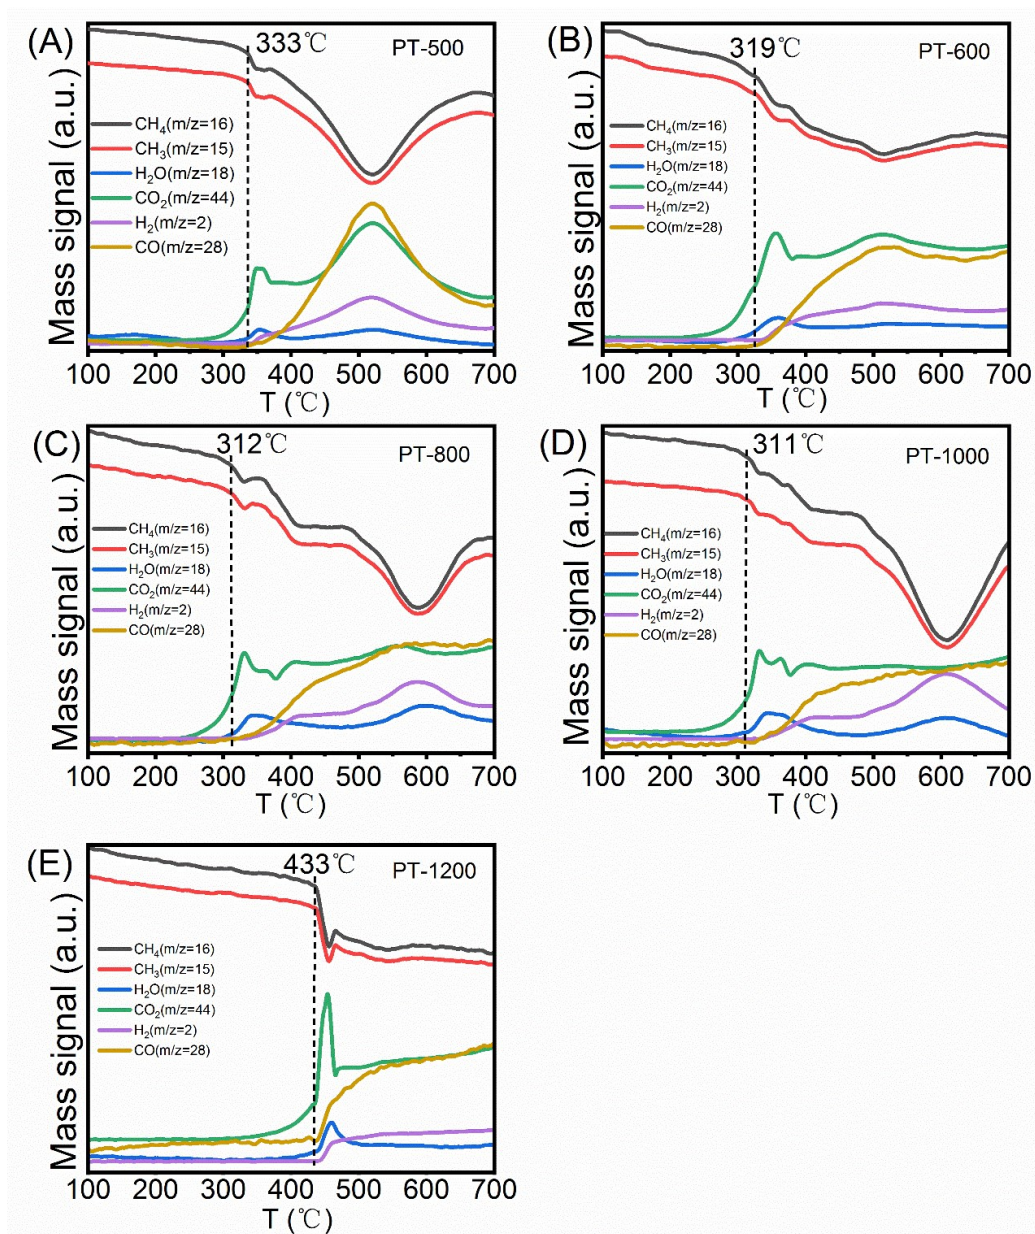

**Fig. S8** CH<sub>4</sub>-TPR profiles of the PT-x catalysts.

**Table S8.** XPS analyses of Pd 3d<sub>5/2</sub> for PT-1000-fresh and PT-1000-used catalysts.

| sample        | Pd <sup>4+</sup> | Pd <sup>2+</sup> | Pd <sup>0</sup> | n(Pd)/n(Ti) ratio<br>(×10 <sup>2</sup> ) |
|---------------|------------------|------------------|-----------------|------------------------------------------|
|               | BE (eV)/%        | BE (eV)/%        | BE (eV)/%       |                                          |
| PT-1000-fresh | 337.5/15.1       | 336.5/81.1       | 335.1/3.8       | 11.4                                     |
| P T-1000-used | 337.5/18.4       | 336.6/75.2       | 335.2/6.3       | 10.1                                     |

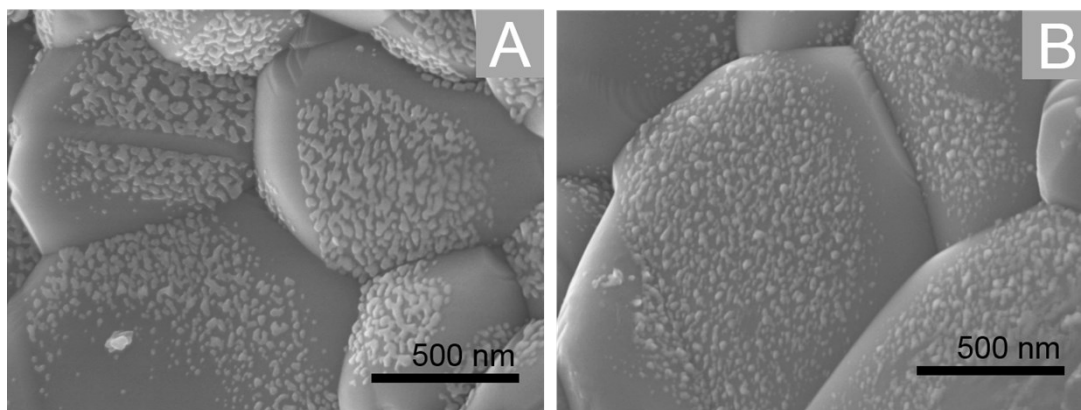

**Fig. S9** SEM images of PT-1000-fresh (A) and PT-1000-used (B) catalysts.

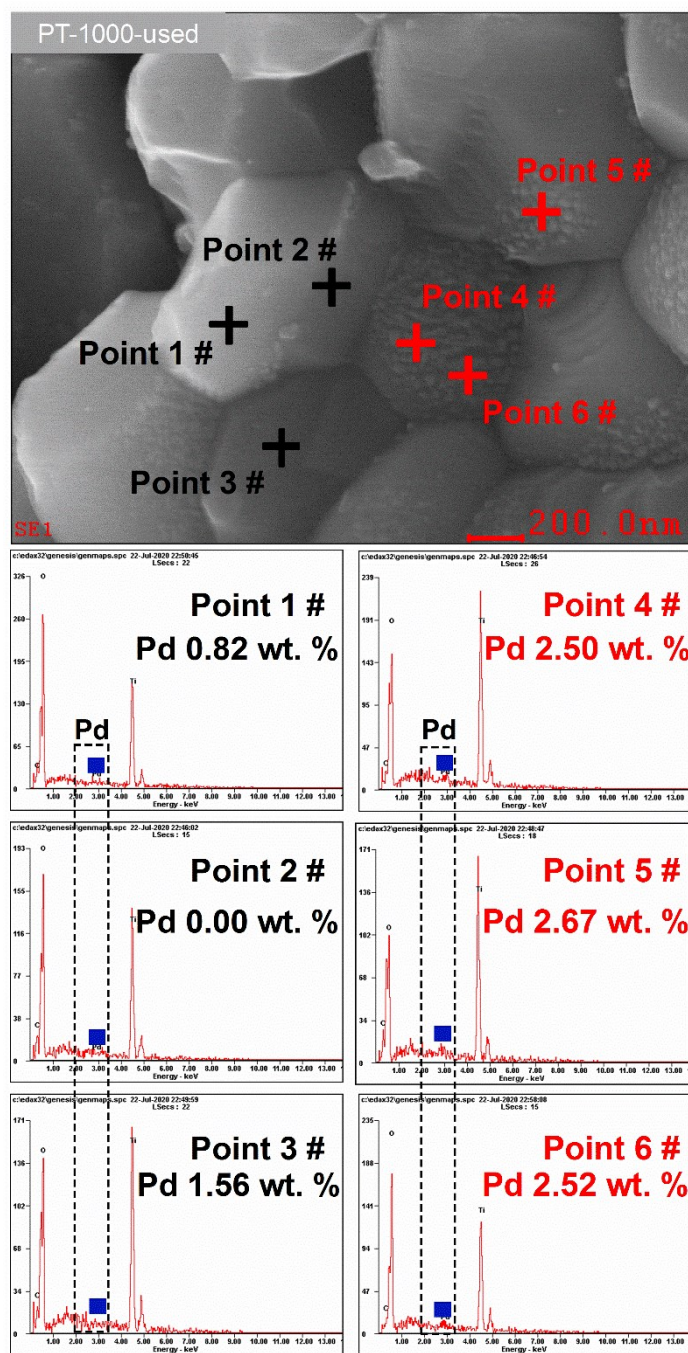

**Fig. S10** EDS analysis performed on the individual particles in PT-1000-used catalyst.



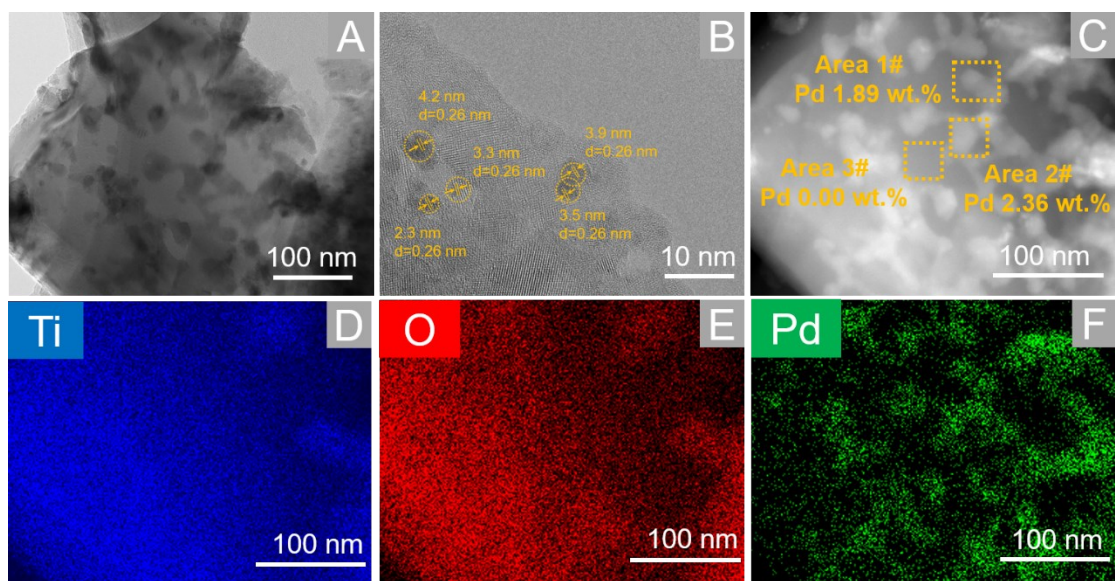

**Fig. S11** HRTEM images (A, B), HAADF-STEM images (C) and EDS elemental maps (D, E, F) of the PT-1000-used catalyst.

**Table S9.** O<sub>2</sub>-TPO profiles of PT-1000-fresh and PT-1000-used catalysts.

| sample        | Decomposition<br>peak area of PdO | Decomposition<br>peak area of PdO <sub>2</sub> | Re-oxidation<br>peak area of Pd <sup>0</sup> | (PdO+PdO <sub>2</sub> )/<br>Pd <sup>0</sup> |
|---------------|-----------------------------------|------------------------------------------------|----------------------------------------------|---------------------------------------------|
| PT-1000-fresh | 16.76                             | -                                              | 16.27                                        | 1.03                                        |
| PT-1000-used  | 13.44                             | 2.81                                           | 13.30                                        | 1.22                                        |

## References

1. F. Niu, S. Li, Y. Zong and Q. Yao, *J. Phys. Chem. C*, 2014, **118**, 19165-19171.
2. S. Ali, M. J. Al-Marri, A. S. Al-Jaber, A. G. Abdelmoneim and M. M. Khader, *J. Nat. Gas. Sci. Eng.*, 2018, **55**, 625-633.
3. A. Janbey, W. Clark, E. Noordally, S. Grimes and S. Tahir, *Chemosphere*, 2003, **52**, 1041-1046.
4. A. M. Venezia, G. Di Carlo, G. Pantaleo, L. F. Liotta, G. Melaet and N. Kruse, *Appl. Catal.B*, 2009, **88**, 430-437.
5. C.-B. Wang, H.-G. Lee, T.-F. Yeh, S.-N. Hsu and K.-S. Chu, *Thermochim. Acta*, 2003, **401**, 209-216.
6. K. Sekizawa, H. Widjaja, S. Maeda, Y. Ozawa and K. Eguchi, *Catal. Today*, 2000, **59**, 69-74.
7. S. R. G. Carrazán, R. Mateos, V. Rives and P. Ruiz, *Catal. Today*, 2006, **112**, 161-164.
8. W. Lin, Y. X. Zhu, N. Z. Wu, Y. C. Xie, I. Murwani and E. Kemnitz, *Appl. Catal.B*, 2004, **50**, 59-66.
